# Supplementary material for: Transmission-blocking interventions eliminate malaria from laboratory populations
Source: PubMed Central journal article supplement — Nat Commun. 2013 May 7;4:1812–. doi: 10.1038/ncomms2840 (PMC3674233; doi:10.1038/ncomms2840), 2013-05-07
Supplement: ncomms2840-s1.pdf [file ncomms2840-s1.pdf]

**Supplementary Information:**

**Supplementary Figure S1: Schematic of the chain binomial model for the experiment.**

Red boxes represent mouse populations whilst green boxes denote mosquito populations. The annotations are described in the text.

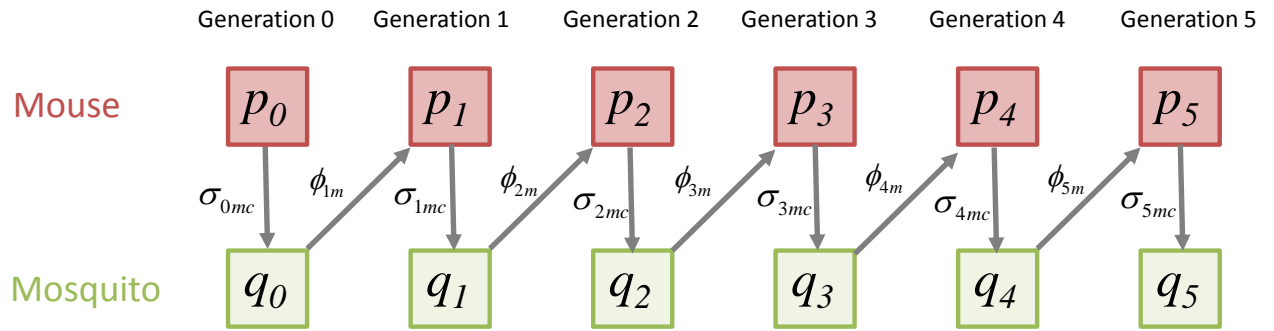

**Supplementary Figure S2.** Continued sensitivity of *Plasmodium berghei* following 5 cycles of transmission to atovaquone. ATV dosage was 0.5 mg/kg. DMSO (*i.p.*) was used as a negative control. Oocysts present on the mosquito midguts were counted 10 days post-feed. Data points indicate individual mosquitoes. X-axis groups represent individual mice. Horizontal lines indicate the mean number of oocysts for each mouse (+/- sem). Mean ATV impact from 3 replicates was 100% reduction in oocyst intensity and 100% reduction in infection prevalence. All parasites demonstrated complete ATV sensitivity identical to the originating WT *P. berghei* 2.34 parasite.

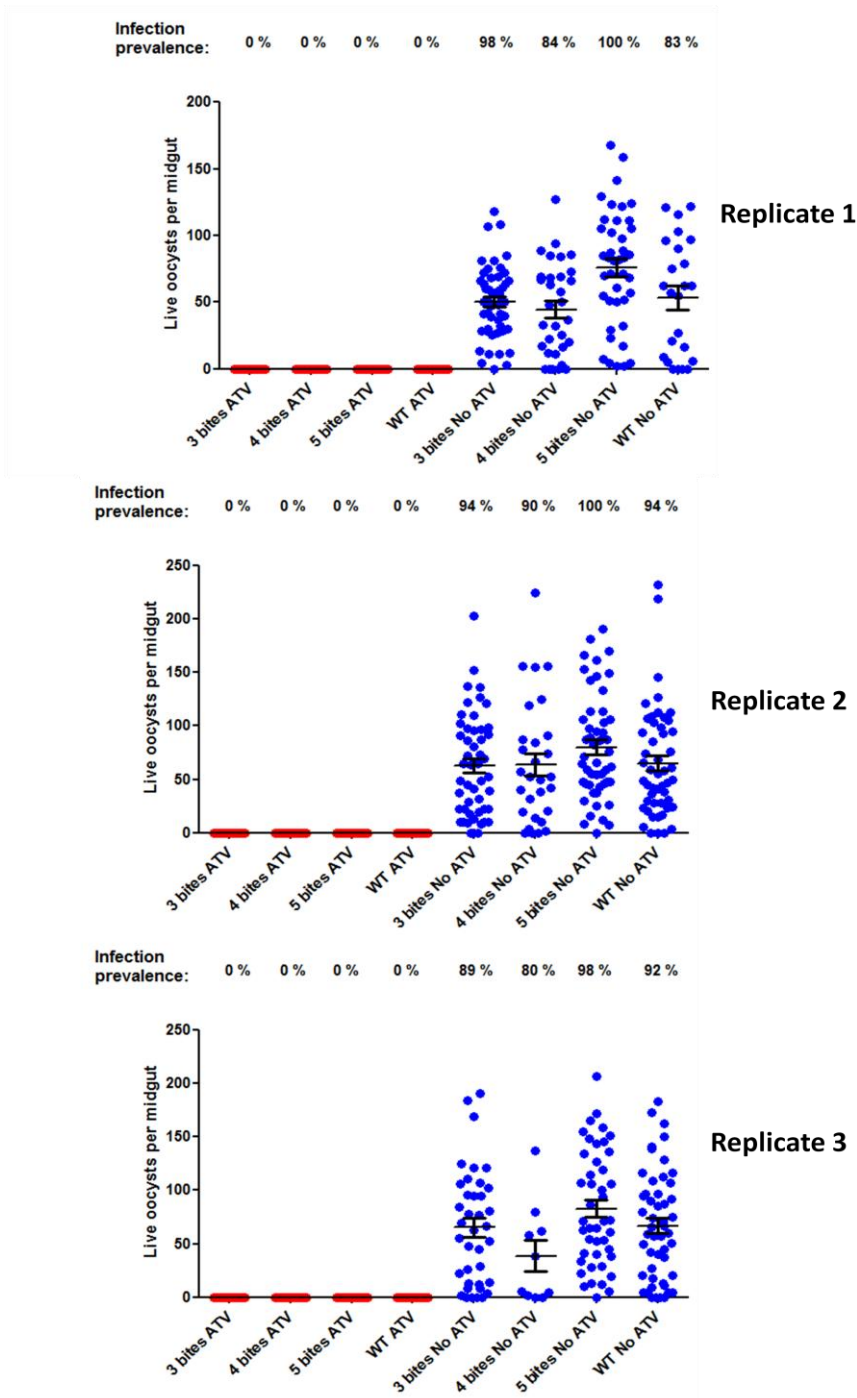

**Supplementary Table S1.** Effect of a TBI with a classically measured efficacy of TB<sub>ooc</sub> 57/32% on sporozoite rate (proportion of biting mosquitoes with salivary gland sporozoites) over 5 successive transmission cycles. Figures in brackets and superscript are upper and lower 95% confidence intervals.

**1 bite:**

|              | <b>Cycle 1</b>               | <b>Cycle 2</b>               | <b>Cycle 3</b>               | <b>Cycle 4</b>               | <b>Cycle 5</b>               |
|--------------|------------------------------|------------------------------|------------------------------|------------------------------|------------------------------|
| <b>- TBI</b> | 0.4 <sup>(0.053-0.853)</sup> | 0.4 <sup>(0.053-0.853)</sup> | 0.4 <sup>(0.053-0.853)</sup> | 0.6 <sup>(0.147-0.947)</sup> | 0.4 <sup>(0.053-0.853)</sup> |
| <b>+ TBI</b> | 0.4 <sup>(0.053-0.853)</sup> | 0 <sup>(0-0.522)</sup>       | 0 <sup>(0-0.522)</sup>       | 0 <sup>(0-0.522)</sup>       | 0 <sup>(0-0.522)</sup>       |

**2 bites:**

|              | <b>Cycle 1</b>               | <b>Cycle 2</b>               | <b>Cycle 3</b>               | <b>Cycle 4</b>               | <b>Cycle 5</b>               |
|--------------|------------------------------|------------------------------|------------------------------|------------------------------|------------------------------|
| <b>- TBI</b> | 0.2 <sup>(0.025-0.556)</sup> | 0.5 <sup>(0.187-0.813)</sup> | 0.4 <sup>(0.122-0.738)</sup> | 0.6 <sup>(0.262-0.878)</sup> | 0.3 <sup>(0.067-0.652)</sup> |
| <b>+ TBI</b> | 0.1 <sup>(0.003-0.445)</sup> | 0.3 <sup>(0.067-0.652)</sup> | 0 <sup>(0-0.308)</sup>       | 0 <sup>(0-0.308)</sup>       | 0 <sup>(0-0.308)</sup>       |

**3 bites:**

|              | <b>Cycle 1</b>                | <b>Cycle 2</b>                | <b>Cycle 3</b>                | <b>Cycle 4</b>                | <b>Cycle 5</b>                |
|--------------|-------------------------------|-------------------------------|-------------------------------|-------------------------------|-------------------------------|
| <b>- TBI</b> | 0.53 <sup>(0.27-0.787)</sup>  | 0.73 <sup>(0.449-0.922)</sup> | 0.67 <sup>(0.384-0.882)</sup> | 0.6 <sup>(0.323-0.837)</sup>  | 0.53 <sup>(0.266-0.787)</sup> |
| <b>+ TBI</b> | 0.47 <sup>(0.213-0.734)</sup> | 0.53 <sup>(0.266-0.787)</sup> | 0.47 <sup>(0.213-0.734)</sup> | 0.53 <sup>(0.266-0.787)</sup> | 0.6 <sup>(0.323-0.837)</sup>  |

**4 bites:**

|              | <b>Cycle 1</b>               | <b>Cycle 2</b>               | <b>Cycle 3</b>               | <b>Cycle 4</b>                | <b>Cycle 5</b>                |
|--------------|------------------------------|------------------------------|------------------------------|-------------------------------|-------------------------------|
| <b>- TBI</b> | 0.6 <sup>(0.361-0.809)</sup> | 0.7 <sup>(0.457-0.881)</sup> | 0.5 <sup>(0.272-0.728)</sup> | 0.65 <sup>(0.4.8-0.846)</sup> | 0.75 <sup>(0.509-0.913)</sup> |
| <b>+ TBI</b> | 0.5 <sup>(0.272-0.728)</sup> | 0.7 <sup>(0.457-0.881)</sup> | 0.7 <sup>(0.457-0.881)</sup> | 0.75 <sup>(0.509-0.913)</sup> | 0.9 <sup>(0.683-0.988)</sup>  |

**5 bites:**

|              | <b>Cycle 1</b>                | <b>Cycle 2</b>                | <b>Cycle 3</b>                | <b>Cycle 4</b>                | <b>Cycle 5</b>                |
|--------------|-------------------------------|-------------------------------|-------------------------------|-------------------------------|-------------------------------|
| <b>- TBI</b> | 0.6 <sup>(0.387-0.789)</sup>  | 0.52 <sup>(0.313-0.722)</sup> | 0.48 <sup>(0.278-0.687)</sup> | 0.64 <sup>(0.425-0.820)</sup> | 0.76 <sup>(0.549-0.609)</sup> |
| <b>+ TBI</b> | 0.68 <sup>(0.465-0.851)</sup> | 0.48 <sup>(0.278-0.687)</sup> | 0.72 <sup>(0.506-0.879)</sup> | 0.6 <sup>(0.387-0.798)</sup>  | 0.8 <sup>(0.593-0.932)</sup>  |
